# Supplementary material for: Response of Organic Fertilizer Application to Soil Microorganisms and Forage Biomass in Grass–Legume Mixtures
Source: MDPI journal article supplement (doi:10.3390/agronomy13020481), 2023-02-07

Table S1. The treatments and the number of replicates in this experiment.

| Planting pattern     | Soil type        | Sample designation   | Forage species | # of replicates |                          |    |
|----------------------|------------------|----------------------|----------------|-----------------|--------------------------|----|
| Monoculture          | Rhizosphere soil | G                    | Aba            | 6               |                          |    |
|                      |                  | CKG                  | Aba            | 5               |                          |    |
|                      |                  | MG                   | Chuancao+Aba   | 9               |                          |    |
|                      |                  | CKMG                 | Chuancao+Aba   | 9               |                          |    |
|                      |                  | ML                   | Beilin 201     | 10              |                          |    |
| Grass-legume mixture |                  | CKML                 | Beilin 201     | 11              |                          |    |
|                      |                  | BG                   | Aba            | 6               |                          |    |
| Monoculture          |                  | CKBG                 | Aba            | 5               |                          |    |
|                      |                  | Grass-legume mixture | Bulk soil      | BF              | Chuancao+Aba+ Beilin 201 | 12 |
|                      |                  |                      |                | BCK             | Chuancao+Aba+ Beilin 201 | 12 |

Table S2. Physicochemical properties and forage biomass of soils from grass-legume mixtures under organic fertilization and non-fertilized. Under the grass-legume mixtures, MG: rhizosphere samples of grass OF; CKMG: rhizosphere samples of grass non-OF; ML: rhizosphere samples of legume OF; CKML: rhizosphere samples of legume non-OF; BF: bulk soils samples of OF; BCK: bulk soil samples of non-OF.

| Soil properties                           | Soil sample in different group |                |                 |                 |                 |                  |
|-------------------------------------------|--------------------------------|----------------|-----------------|-----------------|-----------------|------------------|
|                                           | MG                             | CKMG           | ML              | CKML            | BF              | BCK              |
| TN (mg·kg <sup>-1</sup> )                 | 1732.98±188.30a                | 1632.78±97.66a | 1810.96±214.37a | 1666.92±139.21a | 1802.82±206.01a | 1647.39±135.72ab |
| NO <sub>3</sub> -N (mg·kg <sup>-1</sup> ) | 40.85±3.19a                    | 39.85±2.68a    | 40.28±2.24a     | 39.47±2.24a     | 40.75±2.84a     | 39.75±2.30a      |
| NH <sub>4</sub> -N (mg·kg <sup>-1</sup> ) | 4.35±0.71a                     | 4.25±0.75a     | 4.44±0.77a      | 4.32±0.83a      | 4.47±0.84a      | 4.40±0.74a       |
| TOC (%)                                   | 2.20±0.26a                     | 1.84±0.29a     | 2.26±0.28a      | 2.03±0.27a      | 2.27±0.27a      | 1.94±0.31ab      |

Different letters in columns indicate significant differences ( $P < 0.05$ ).

Figure S1 Diversity of microbial communities in the OF and non-OF bulk soil and rhizosphere soil based on 16S rRNA gene and ITS gene sequencing. (a) Monoculture; (b) Grass-legume mixtures. \* indicates significant differences ( $P < 0.05$ ). Under the monoculture: G: rhizosphere samples of OF; CKG: rhizosphere samples of non-OF; BG: bulk soil samples of OF; CKBG: bulk soil samples of non-OF. Under the grass-legume mixture: MG: rhizosphere samples of grass OF; CKMG: rhizosphere samples of grass non-OF; ML: rhizosphere samples of legume OF; CKML: rhizosphere samples of legume non-OF; BF: bulk soils samples of OF; BCK: bulk soil samples of non-OF.

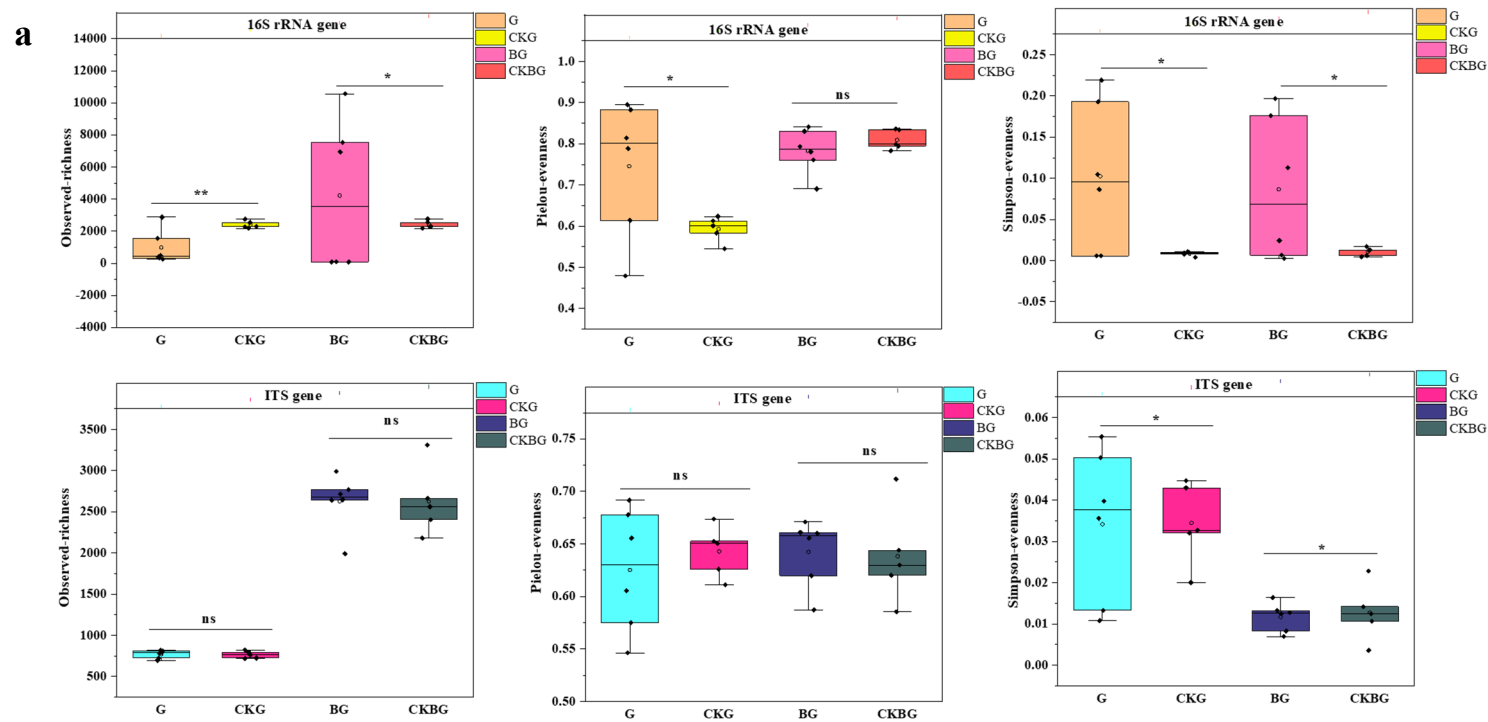

**b**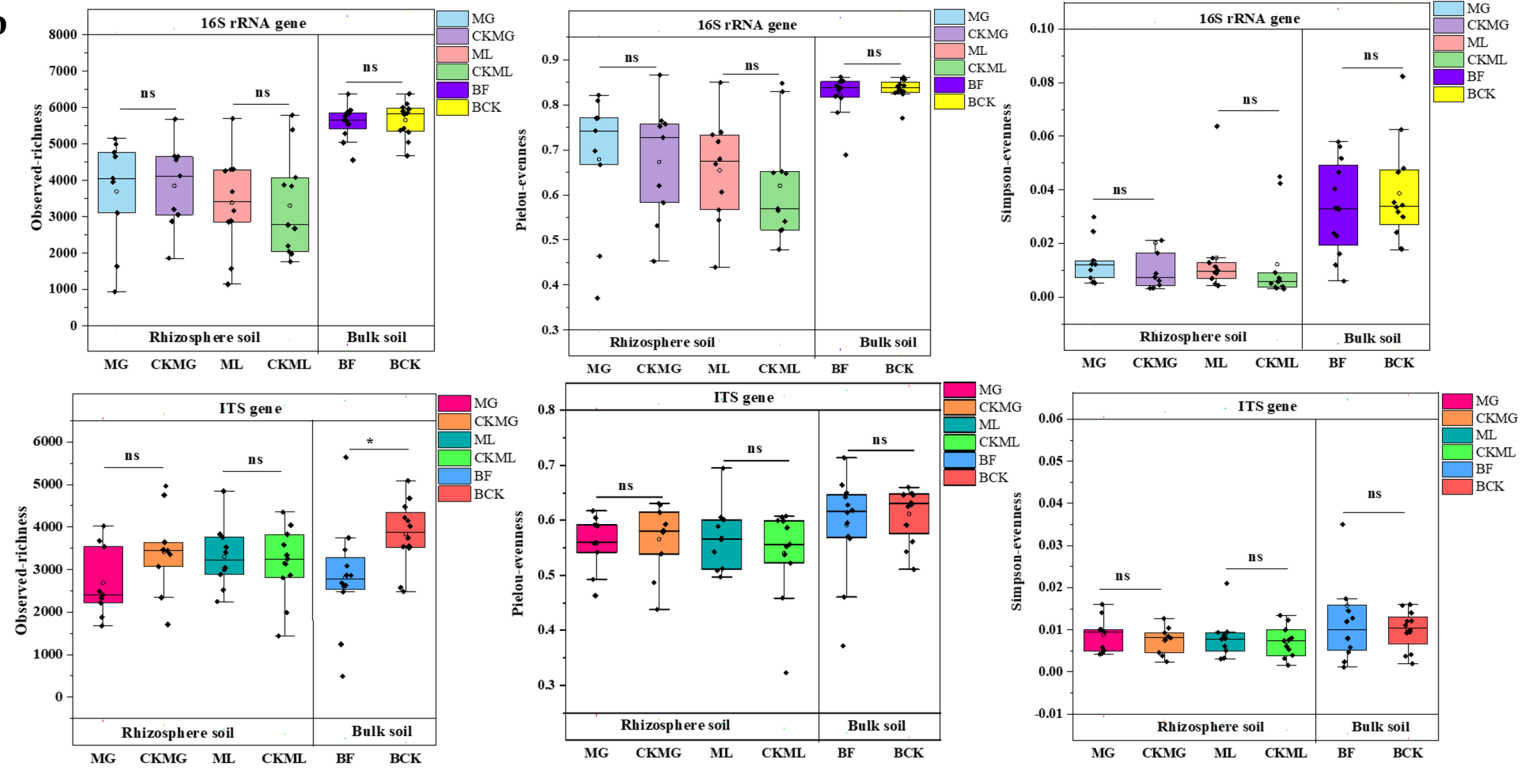

Figure S2 NMDS plot of rhizosphere and bulk soil microbial communities in organic fertilization and non-fertilization under grass-legume mixtures. Note: MG: black squares represent grass rhizosphere OF; CKMG: green circle represents non-OF in the rhizosphere of Grass; ML: pink triangle represents legume rhizosphere OF; CKML: blue pentagram represents the legume rhizosphere non-OF; BF: yellow diamonds represent bulk soil fertilization; BCK: blue triangle represents bulk soil non-fertilization.

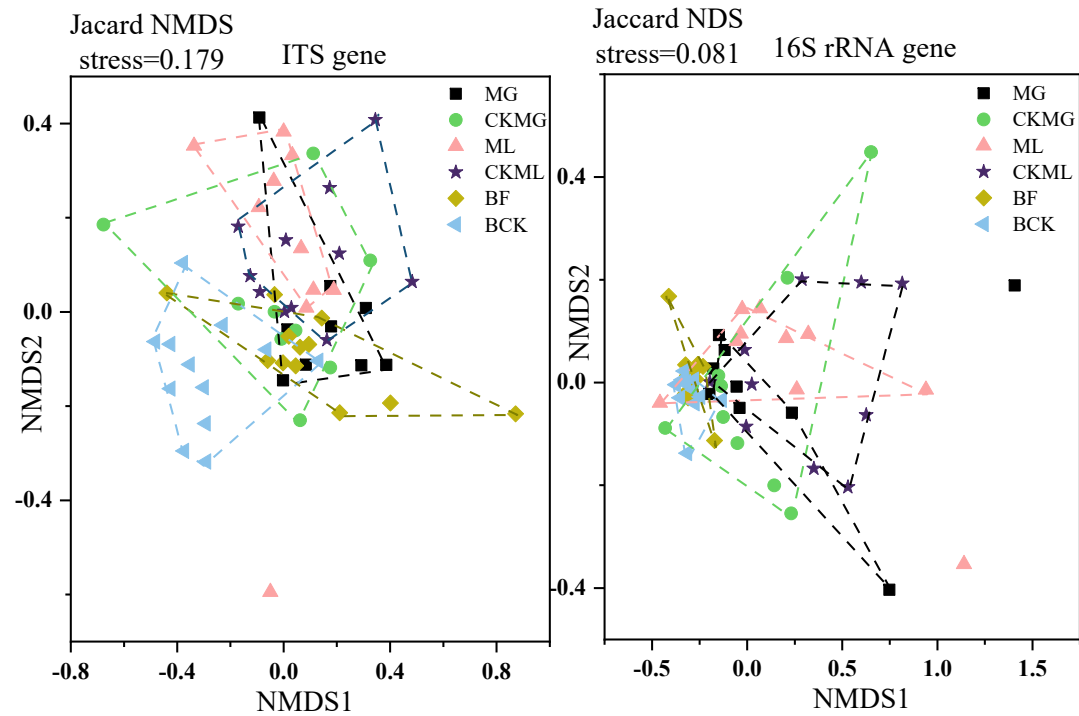

Figure S3. Microbial composition of rhizosphere and bulk soils under grass-legume mixtures. (a) Fungi, (b) Prokaryotic. MG: rhizosphere samples of grass OF; CKMG: rhizosphere samples of grass non-OF; ML: rhizosphere samples of legume OF; CKML: rhizosphere samples of legume non-OF; BF: bulk soils samples of OF; BCK: bulk soil samples of non-OF.

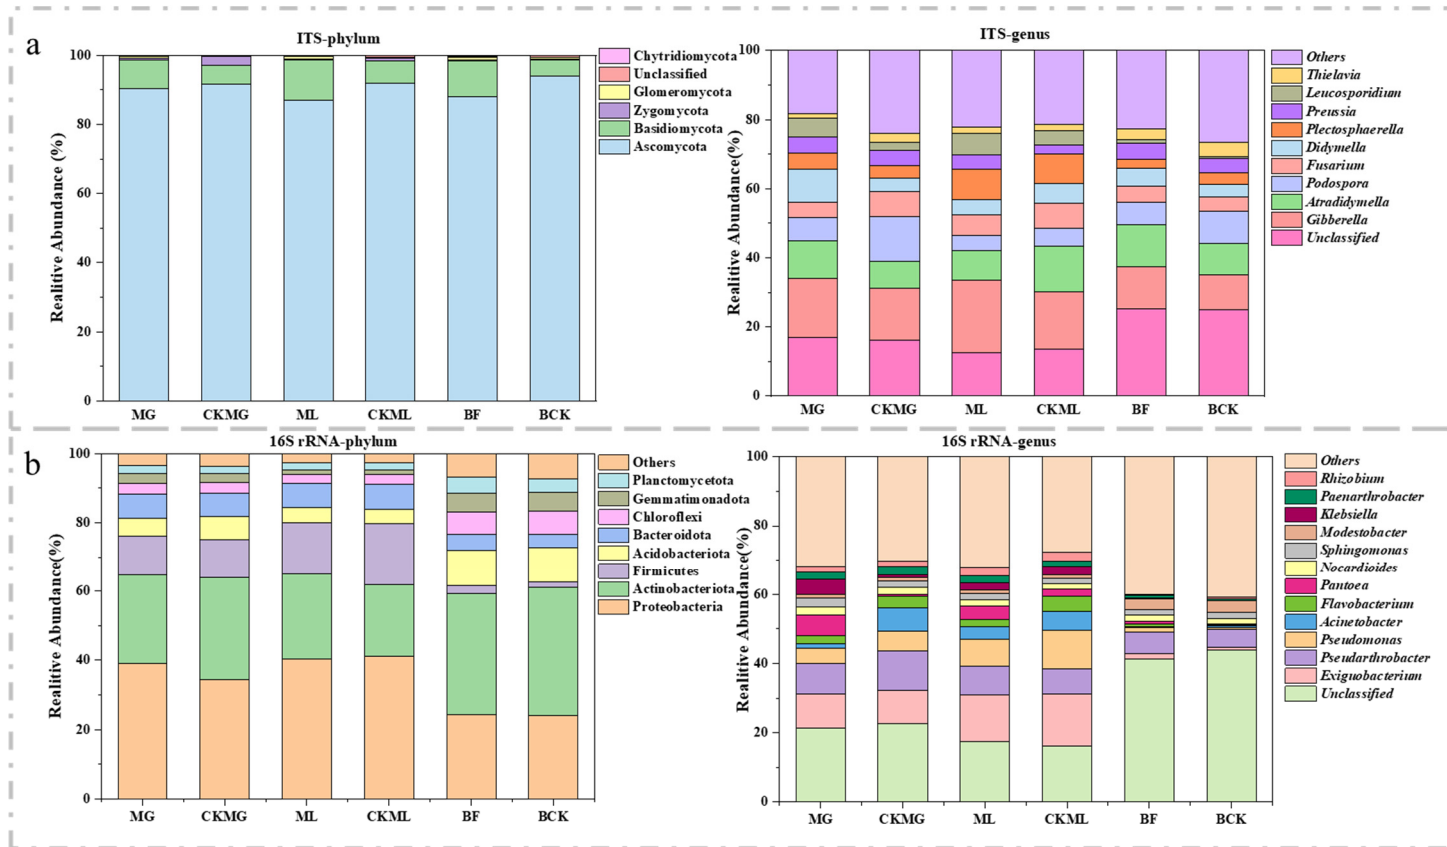

Figure S4. Histogram of LDA SCORE (log 10) distribution. (a) Comparison of Grass (MG) and legume (ML) in rhizosphere fungal communities. (b) Comparison of bulk soil (BCK V.S. BF) for bacterial and fungal communities.

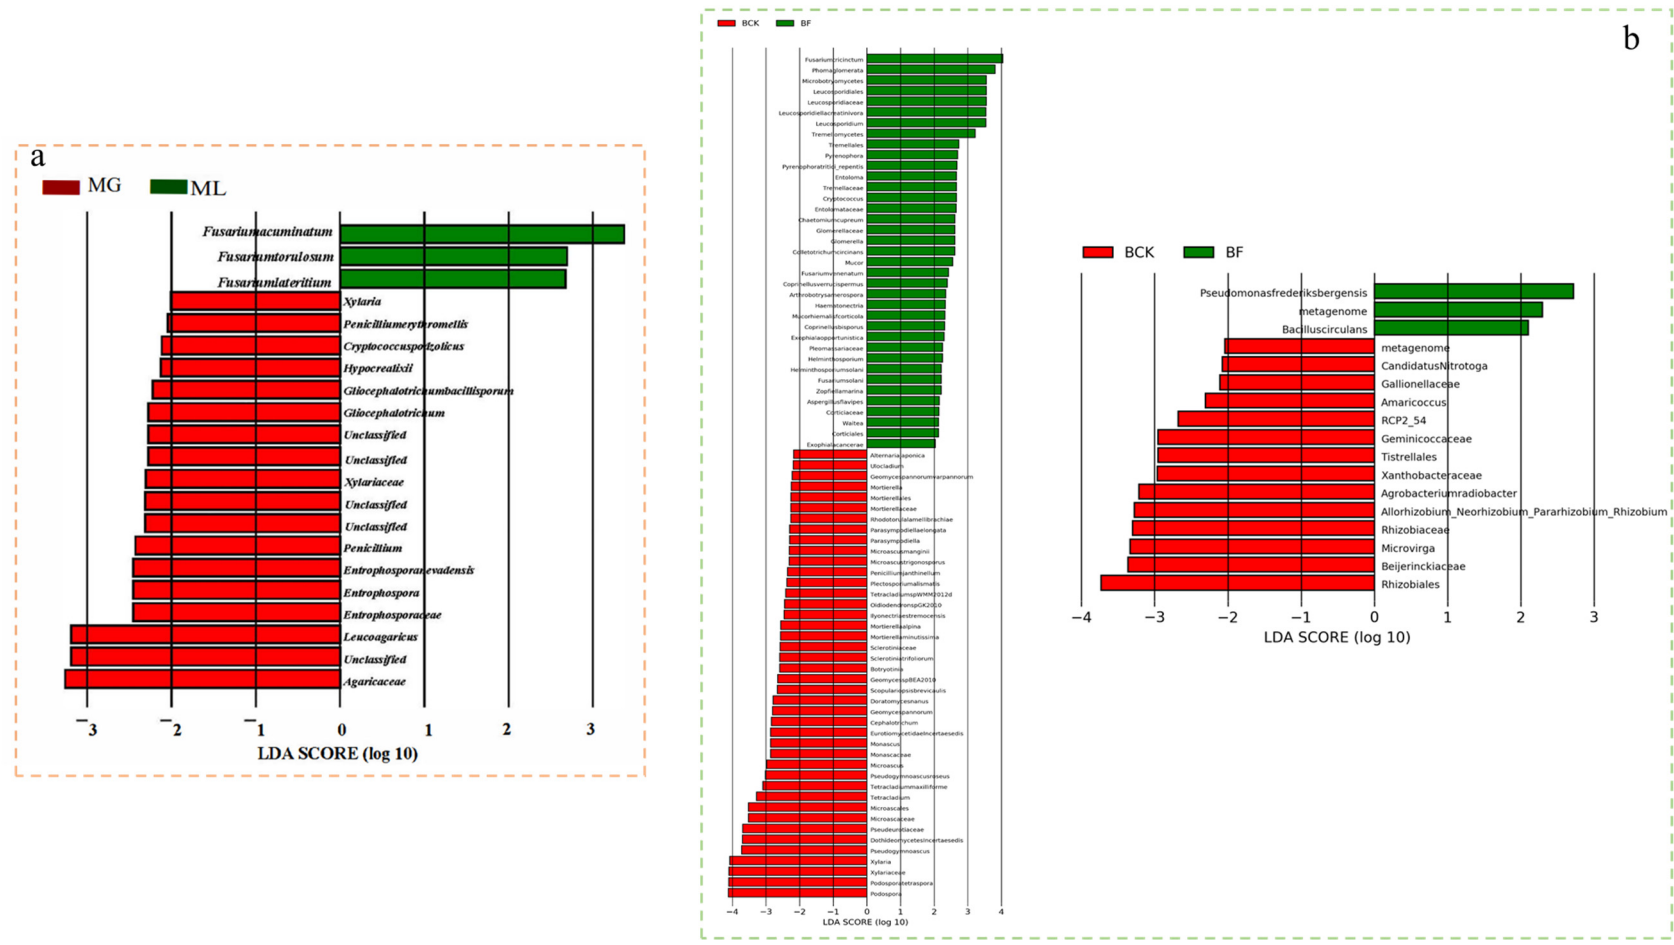

Supplement: s1 [file s1 › agronomy-2186802-supplementary.pdf]
