# Supplementary material for: Response of Organic Fertilizer Application to Soil Microorganisms and Forage Biomass in Grass–Legume Mixtures
Source: MDPI journal article supplement (doi:10.3390/agronomy13020481), 2023-02-07
Supplement: s1 [file s1]

Archive with 1 entries (1 files):
- agronomy-2186802-supplementary.pdf
